# Supplementary material
Source: ML conference proceedings conference paper supplement (https://aclanthology.org/2021.findings-emnlp.34)
Supplement: Software [file Results.xlsx]

## Sheet: Metrics
		dev_1_acc	dev_k_acc	dev_macro_F1	test_1_acc	test_k_acc	test_macro_F1	sd_1_match	sd_k_match	machine	train_time_item	train_time_epoch	training_epoch	n_parameter	model_size	eval_time_single	eval_time_whole
Ngram	uni, 0,1	67.1875	91.2109	0.6211	59.5703	89.6484	0.5824	71.1198	95.2865	GPU	0.340136	12.69	32	3818611	15276027	0.0031	6.9167
	w/o LS	67.3828	90.8203	0.6311	59.9609	88.8672	0.5887	70.4948	95.1302
		-0.289837	0.43008	-1.58453	-0.651425	0.879064	-1.07015	0.88659	0.164301
BoE	prior, 0,01	64.2578	91.6016	0.6248	62.6953	91.4063	0.6214	66.1458	94.1406	CPU	0.177305	3.18	20	1879822	7521781	0.0007	1.4415
	w/o LS	64.8438	91.9922	0.6311	62.1094	91.6016	0.6193	68.8021	94.5313
		-0.90371	-0.424601	-0.998257	0.943335	-0.213206	0.339093	-3.86078	-0.413302
GRU+Attn	uni, 0,2	64.2578	91.7969	0.6136	61.5234	90.2344	0.6106	66.3542	94.0625	GPU	0.03	1.97	15	183179	7992174	0.2245	4.4418
	w/o LS	64.2578	91.6016	0.6083	60.5469	91.4063	0.5928	64.2708	92.7083
		0	0.213206	0.871281	1.6128	-1.28208	3.0027	3.2416	1.46071
BERT	uni, 0,2	71.6797	93.9453	0.7042	66.9922	94.5313	0.6734	71.5104	96.1458	GPU*4	0.54	46.2	10	109490699	438020307	0.5542	1598.06
	w/o LS	70.3125	94.3359	0.696	67.5781	93.5547	0.6715	71.5625	95.9635
		1.94446	-0.414052	1.17816	-0.866997	1.04388	0.282949	-0.0728035	0.189968
ULMFiT	prior, 0,1	70.1172	94.3359	0.6883	67.1875	93.1641	0.6697	70.651	96.224	CPU	2.53	213.61	7	24550730	98221993	0.0589	151.752
	w/o LS	69.3359	93.9453	0.684	66.4063	92.3828	0.6609	70.2083	96.1458
		1.12683	0.415774	0.628655	1.17639	0.84572	1.33152	0.630552	0.0813348

## Sheet: Per_Class
			Ngram			BoE			GRU+Attn			BERT			ULMFiT
			uni, 0,1	w/o LS		prior,0,01	w/o LS		uni, 0,2	w/o LS		uni, 0,2	w/o LS		prior, 0,1	w/o LS
F1	1	test	0.581818	0.581818	0	0.590164	0.580645	0.00951877	0.655738	0.6	0.0557377	0.677419	0.644068	0.0333516	0.603175	0.626866	-0.0236911
	2	test	0.598639	0.586667	0.0119728	0.653846	0.643357	0.0104895	0.634483	0.647059	-0.0125761	0.697987	0.716216	-0.0182296	0.728571	0.7	0.0285714
	3	test	0.513514	0.524138	-0.0106244	0.569231	0.536232	0.0329989	0.583942	0.586466	-0.00252456	0.5625	0.625	-0.0625	0.627737	0.606897	0.0208407
	4	test	0.530612	0.528497	0.00211484	0.506173	0.522222	-0.0160494	0.517241	0.540541	-0.0232992	0.581006	0.586387	-0.00538185	0.576087	0.582857	-0.00677019
	5	test	0.304348	0.304348	0	0.42623	0.393443	0.0327869	0.387097	0.385965	0.00113186	0.491803	0.45283	0.0389731	0.517241	0.482759	0.0344828
	6	test	0.539683	0.567164	-0.0274816	0.568182	0.547945	0.0202366	0.586667	0.545455	0.0412121	0.692308	0.693333	-0.00102564	0.60274	0.56338	0.0393594
	7	test	0.747253	0.75	-0.00274725	0.704545	0.722892	-0.0183461	0.681818	0.632653	0.0491651	0.736842	0.74359	-0.00674764	0.776471	0.752941	0.0235294
	8	test	0.6	0.627451	-0.027451	0.679245	0.733333	-0.0540881	0.642857	0.642857	0	0.787879	0.769231	0.018648	0.774194	0.779661	-0.00546747
	9	test	0.636364	0.636364	0	0.673913	0.688172	-0.014259	0.622222	0.560976	0.0612466	0.688172	0.666667	0.0215054	0.681319	0.695652	-0.0143335
	10	test	0.771429	0.780142	-0.00871327	0.842105	0.824427	0.0176778	0.794118	0.785714	0.00840336	0.818182	0.817518	0.00066357	0.80916	0.818182	-0.00902151
	1	val	0.4	0.44	-0.04	0.517241	0.466667	0.0505747	0.491228	0.5	-0.00877193	0.52459	0.517241	0.00734878	0.576271	0.571429	0.00484262
	2	val	0.680272	0.68	0.000272109	0.675862	0.701493	-0.0256305	0.573529	0.573643	-0.000113999	0.76259	0.764706	-0.00211595	0.75	0.736842	0.0131579
	3	val	0.662791	0.662791	0	0.618421	0.621118	-0.00269696	0.649682	0.666667	-0.0169851	0.679012	0.674699	0.00431355	0.634146	0.625	0.00914634
	4	val	0.630435	0.614525	0.0159096	0.576923	0.57485	0.00207278	0.538922	0.554913	-0.0159911	0.639053	0.662791	-0.0237374	0.627219	0.642857	-0.0156382
	5	val	0.5	0.486486	0.0135135	0.382979	0.44	-0.0570213	0.375	0.409091	-0.0340909	0.577778	0.571429	0.00634921	0.538462	0.583333	-0.0448718
	6	val	0.523077	0.553846	-0.0307692	0.604167	0.554217	0.0499498	0.615385	0.561798	0.0535869	0.736842	0.675325	0.0615174	0.658228	0.623377	0.0348512
	7	val	0.715789	0.755556	-0.0397661	0.735632	0.761905	-0.0262726	0.756098	0.725275	0.0308228	0.785714	0.823529	-0.0378151	0.795181	0.809524	-0.0143431
	8	val	0.676923	0.6875	-0.0105769	0.724638	0.722222	0.00241546	0.732394	0.746667	-0.0142723	0.826667	0.826667	0	0.794521	0.773333	0.0211872
	9	val	0.575342	0.578947	-0.0036049	0.575342	0.613333	-0.0379909	0.594595	0.550725	0.04387	0.64	0.588235	0.0517647	0.657895	0.631579	0.0263158
	10	val	0.846715	0.851064	-0.0043485	0.836879	0.855072	-0.018193	0.808511	0.794326	0.0141844	0.869565	0.855172	0.0143928	0.851064	0.842857	0.00820669
	1	train	0.959248	0.957614	0.00163383	0.802568	0.886792	-0.0842242	0.668942	0.676717	-0.00777494	0.98773	0.900164	0.0875664	0.845659	0.85759	-0.0119308
	2	train	0.969697	0.966507	0.00318979	0.778932	0.879173	-0.100242	0.660641	0.672326	-0.0116851	0.987302	0.950198	0.037104	0.826337	0.819376	0.00696142
	3	train	0.968678	0.966361	0.00231752	0.762542	0.877743	-0.115201	0.648287	0.652137	-0.00385008	0.995342	0.912281	0.0830609	0.817971	0.808675	0.00929512
	4	train	0.95375	0.953096	0.000654315	0.740013	0.842236	-0.102223	0.655921	0.66217	-0.0062498	0.993532	0.899196	0.0943357	0.784718	0.77526	0.00945775
	5	train	0.878049	0.884097	-0.00604825	0.733509	0.796915	-0.0634059	0.610966	0.588235	0.0227308	0.985437	0.875318	0.110119	0.833747	0.802005	0.0317419
	6	train	0.979592	0.979592	0	0.746556	0.9	-0.153444	0.654147	0.66358	-0.00943314	0.996914	0.945783	0.0511304	0.866242	0.866242	0
	7	train	0.978947	0.977602	0.00134526	0.863237	0.940397	-0.0771602	0.772664	0.771392	0.0012718	0.994737	0.953395	0.0413414	0.913613	0.918848	-0.0052356
	8	train	0.986408	0.988372	-0.00196433	0.861789	0.934363	-0.0725743	0.813627	0.810916	0.00271108	0.998081	0.963671	0.0344095	0.928571	0.943026	-0.0144541
	9	train	0.965612	0.962759	0.00285348	0.781382	0.87656	-0.0951781	0.715976	0.707593	0.00838344	0.99187	0.925926	0.065944	0.840456	0.856338	-0.0158822
	10	train	0.97828	0.975737	0.00254319	0.8908	0.928263	-0.0374631	0.851317	0.862447	-0.0111303	0.995595	0.954237	0.0413574	0.906937	0.913601	-0.00666397
PC		test	0.444444	0.444444	0	0.5	0.692308	-0.192308	0.555556	0.5	0.0555556	0.583333	0.527778	0.0555556	0.527778	0.583333	-0.0555556
		test	0.594595	0.594595	0	0.689189	0.666667	0.0225225	0.621622	0.594595	0.027027	0.702703	0.716216	-0.0135135	0.689189	0.662162	0.027027
		test	0.603175	0.603175	0	0.587302	0.493333	0.0939683	0.634921	0.619048	0.015873	0.571429	0.634921	-0.0634921	0.68254	0.698413	-0.015873
		test	0.641975	0.62963	0.0123457	0.506173	0.474747	0.0314254	0.555556	0.617284	-0.0617284	0.641975	0.691358	-0.0493827	0.654321	0.62963	0.0246914
		test	0.21875	0.21875	0	0.40625	0.413793	-0.0075431	0.375	0.34375	0.03125	0.46875	0.375	0.09375	0.46875	0.4375	0.03125
		test	0.395349	0.44186	-0.0465116	0.581395	0.666667	-0.0852713	0.511628	0.488372	0.0232558	0.627907	0.604651	0.0232558	0.511628	0.465116	0.0465116
		test	0.809524	0.785714	0.0238095	0.738095	0.731707	0.00638792	0.714286	0.738095	-0.0238095	0.666667	0.690476	-0.0238095	0.785714	0.761905	0.0238095
		test	0.5	0.533333	-0.0333333	0.6	0.733333	-0.133333	0.6	0.6	0	0.866667	0.833333	0.0333333	0.8	0.766667	0.0333333
		test	0.595745	0.595745	0	0.659574	0.695652	-0.0360777	0.595745	0.489362	0.106383	0.680851	0.638298	0.0425532	0.659574	0.680851	-0.0212766
		test	0.84375	0.859375	-0.015625	0.875	0.80597	0.0690299	0.84375	0.859375	-0.015625	0.84375	0.875	-0.03125	0.828125	0.84375	-0.015625
		val	0.285714	0.314286	-0.0285714	0.428571	0.56	-0.131429	0.4	0.428571	-0.0285714	0.457143	0.428571	0.0285714	0.485714	0.514286	-0.0285714
		val	0.757576	0.772727	-0.0151515	0.742424	0.691176	0.0512478	0.590909	0.560606	0.030303	0.80303	0.787879	0.0151515	0.727273	0.742424	-0.0151515
		val	0.721519	0.721519	0	0.594937	0.609756	-0.0148194	0.64557	0.64557	0	0.696203	0.708861	-0.0126582	0.658228	0.632911	0.0253165
		val	0.707317	0.670732	0.0365854	0.54878	0.564706	-0.0159254	0.54878	0.585366	-0.0365854	0.658537	0.695122	-0.0365854	0.646341	0.658537	-0.0121951
		val	0.36	0.36	0	0.36	0.44	-0.08	0.36	0.36	0	0.52	0.48	0.04	0.56	0.56	0
		val	0.425	0.45	-0.025	0.725	0.534884	0.190116	0.7	0.625	0.075	0.7	0.65	0.05	0.65	0.6	0.05
		val	0.871795	0.871795	0	0.820513	0.711111	0.109402	0.794872	0.846154	-0.0512821	0.846154	0.897436	-0.0512821	0.846154	0.871795	-0.025641
		val	0.55	0.55	0	0.625	0.8125	-0.1875	0.65	0.7	-0.05	0.775	0.775	0	0.725	0.725	0
		val	0.525	0.55	-0.025	0.525	0.657143	-0.132143	0.55	0.475	0.075	0.6	0.5	0.1	0.625	0.6	0.025
		val	0.878788	0.909091	-0.030303	0.893939	0.819444	0.0744949	0.863636	0.848485	0.0151515	0.909091	0.939394	-0.030303	0.909091	0.893939	0.0151515
		train	0.927273	0.924242	0.0030303	0.757576	0.921569	-0.163993	0.6125	0.63125	-0.01875	0.975758	0.833333	0.142424	0.79697	0.830303	-0.0333333
		train	0.968153	0.964968	0.00318471	0.835987	0.877778	-0.0417905	0.665563	0.655629	0.00993377	0.990446	0.957006	0.0334395	0.799363	0.794586	0.00477707
		train	0.982946	0.979845	0.00310078	0.706977	0.88748	-0.180503	0.612954	0.614534	-0.00157978	0.993798	0.886822	0.106977	0.818605	0.809302	0.00930233
		train	0.990909	0.98961	0.0012987	0.733766	0.807143	-0.0733766	0.705333	0.72	-0.0146667	0.997403	0.944156	0.0532468	0.84026	0.822078	0.0181818
		train	0.782609	0.792271	-0.00966184	0.671498	0.851648	-0.180151	0.576355	0.517241	0.0591133	0.980676	0.830918	0.149758	0.811594	0.772947	0.0386473
		train	0.965944	0.965944	0	0.839009	0.908517	-0.0695081	0.663492	0.68254	-0.0190476	1	0.972136	0.0278638	0.842105	0.842105	0
		train	0.973822	0.971204	0.0026178	0.900524	0.951743	-0.0512191	0.752717	0.820652	-0.0679348	0.989529	0.937173	0.052356	0.913613	0.918848	-0.0052356
		train	0.976923	0.980769	-0.00384615	0.815385	0.937984	-0.1226	0.802372	0.822134	-0.0197628	1	0.969231	0.0307692	0.9	0.923077	-0.0230769
		train	0.95122	0.945799	0.00542005	0.750678	0.897727	-0.14705	0.68169	0.616901	0.0647887	0.99187	0.880759	0.111111	0.799458	0.823848	-0.0243902
		train	0.9947	0.9947	0	0.915194	0.908629	0.0065649	0.909256	0.927405	-0.0181488	0.998233	0.9947	0.00353357	0.946996	0.943463	0.00353357
RC		test	0.842105	0.842105	0	0.72	0.5	0.22	0.8	0.75	0.05	0.807692	0.826087	-0.0183946	0.703704	0.677419	0.0262843
		test	0.60274	0.578947	0.0237924	0.621951	0.621622	0.000329598	0.647887	0.709677	-0.0617901	0.693333	0.716216	-0.0228829	0.772727	0.742424	0.030303
		test	0.447059	0.463415	-0.0163558	0.552239	0.587302	-0.0350628	0.540541	0.557143	-0.0166023	0.553846	0.615385	-0.0615385	0.581081	0.536585	0.0444957
		test	0.452174	0.455357	-0.00318323	0.506173	0.580247	-0.0740741	0.483871	0.480769	0.00310174	0.530612	0.509091	0.0215213	0.514563	0.542553	-0.0279901
		test	0.5	0.5	0	0.448276	0.375	0.0732759	0.4	0.44	-0.04	0.517241	0.571429	-0.0541872	0.576923	0.538462	0.0384615
		test	0.85	0.791667	0.0583333	0.555556	0.465116	0.0904393	0.6875	0.617647	0.0698529	0.771429	0.8125	-0.0410714	0.733333	0.714286	0.0190476
		test	0.693878	0.717391	-0.0235138	0.673913	0.714286	-0.0403727	0.652174	0.553571	0.0986025	0.823529	0.805556	0.0179739	0.767442	0.744186	0.0232558
		test	0.75	0.761905	-0.0119048	0.782609	0.733333	0.0492754	0.692308	0.692308	0	0.722222	0.714286	0.00793651	0.75	0.793103	-0.0431034
		test	0.682927	0.682927	0	0.688889	0.680851	0.00803783	0.651163	0.657143	-0.00598007	0.695652	0.697674	-0.00202224	0.704545	0.711111	-0.00656566
		test	0.710526	0.714286	-0.0037594	0.811594	0.84375	-0.0321558	0.75	0.723684	0.0263158	0.794118	0.767123	0.0269944	0.791045	0.794118	-0.00307287
		val	0.666667	0.733333	-0.0666667	0.652174	0.4	0.252174	0.636364	0.6	0.0363636	0.615385	0.652174	-0.0367893	0.708333	0.642857	0.0654762
		val	0.617284	0.607143	0.0101411	0.620253	0.712121	-0.091868	0.557143	0.587302	-0.0301587	0.726027	0.742857	-0.0168297	0.774194	0.731343	0.0428503
		val	0.612903	0.612903	0	0.643836	0.632911	0.0109242	0.653846	0.689189	-0.035343	0.662651	0.643678	0.0189724	0.611765	0.617284	-0.00551924
		val	0.568627	0.56701	0.00161714	0.608108	0.585366	0.0227423	0.529412	0.527473	0.00193924	0.62069	0.633333	-0.0126437	0.609195	0.627907	-0.0187116
		val	0.818182	0.75	0.0681818	0.409091	0.44	-0.0309091	0.391304	0.473684	-0.0823799	0.65	0.705882	-0.0558824	0.518519	0.608696	-0.0901771
		val	0.68	0.72	-0.04	0.517857	0.575	-0.0571429	0.54902	0.510204	0.0388155	0.777778	0.702703	0.0750751	0.666667	0.648649	0.018018
		val	0.607143	0.666667	-0.0595238	0.666667	0.820513	-0.153846	0.72093	0.634615	0.0863148	0.733333	0.76087	-0.0275362	0.75	0.755556	-0.00555556
		val	0.88	0.916667	-0.0366667	0.862069	0.65	0.212069	0.83871	0.8	0.0387097	0.885714	0.885714	0	0.878788	0.828571	0.0502165
		val	0.636364	0.611111	0.0252525	0.636364	0.575	0.0613636	0.647059	0.655172	-0.00811359	0.685714	0.714286	-0.0285714	0.694444	0.666667	0.0277778
		val	0.816901	0.8	0.0169014	0.786667	0.893939	-0.107273	0.76	0.746667	0.0133333	0.833333	0.78481	0.0485232	0.8	0.797297	0.0027027
		train	0.993506	0.993485	2.11515e-05	0.853242	0.854545	-0.00130313	0.736842	0.729242	0.00760023	1	0.978648	0.0213523	0.900685	0.886731	0.0139535
		train	0.971246	0.968051	0.00319489	0.729167	0.880573	-0.151407	0.655791	0.689895	-0.0341043	0.984177	0.943485	0.0406921	0.855196	0.845763	0.0094332
		train	0.954819	0.953243	0.00157644	0.827586	0.868217	-0.0406308	0.687943	0.694643	-0.00669959	0.99689	0.939245	0.0576449	0.817337	0.80805	0.00928793
		train	0.919277	0.91918	9.73738e-05	0.746367	0.880519	-0.134152	0.612978	0.61294	3.81427e-05	0.989691	0.858323	0.131367	0.736064	0.733488	0.00257588
		train	1	1	0	0.80814	0.748792	0.0593473	0.65	0.681818	-0.0318182	0.990244	0.924731	0.0655127	0.857143	0.833333	0.0238095
		train	0.993631	0.993631	0	0.672457	0.891641	-0.219184	0.645062	0.645646	-0.000583917	0.993846	0.920821	0.073025	0.891803	0.891803	0
		train	0.984127	0.984085	4.21035e-05	0.828916	0.929319	-0.100404	0.793696	0.727711	0.0659854	1	0.97019	0.0298103	0.913613	0.918848	-0.0052356
		train	0.996078	0.996094	-1.53186e-05	0.913793	0.930769	-0.0169761	0.825203	0.8	0.0252033	0.996169	0.958175	0.0379937	0.959016	0.963855	-0.00483903
		train	0.980447	0.980337	0.000109849	0.814706	0.856369	-0.0416627	0.753894	0.829545	-0.0756514	0.99187	0.975976	0.0158939	0.885886	0.891496	-0.00560972
		train	0.962393	0.957483	0.00491017	0.867672	0.948763	-0.0810916	0.800319	0.805994	-0.0056742	0.99297	0.916938	0.076032	0.87013	0.885572	-0.0154423

## Sheet: Results
F1	F1_diff	Precision	Precision_diff	Recall	Recall_diff	split	class
0.581818	0	0.444444	0	0.842105	0	test	1
0.586667	0.0119728	0.594595	0	0.578947	0.0237924	test	2
0.524138	-0.0106244	0.603175	0	0.463415	-0.0163558	test	3
0.528497	0.00211484	0.62963	0.0123457	0.455357	-0.00318323	test	4
0.304348	0	0.21875	0	0.5	0	test	5
0.567164	-0.0274816	0.44186	-0.0465116	0.791667	0.0583333	test	6
0.75	-0.00274725	0.785714	0.0238095	0.717391	-0.0235138	test	7
0.627451	-0.027451	0.533333	-0.0333333	0.761905	-0.0119048	test	8
0.636364	0	0.595745	0	0.682927	0	test	9
0.780142	-0.00871327	0.859375	-0.015625	0.714286	-0.0037594	test	10
0.44	-0.04	0.314286	-0.0285714	0.733333	-0.0666667	val	1
0.68	0.000272109	0.772727	-0.0151515	0.607143	0.0101411	val	2
0.662791	0	0.721519	0	0.612903	0	val	3
0.614525	0.0159096	0.670732	0.0365854	0.56701	0.00161714	val	4
0.486486	0.0135135	0.36	0	0.75	0.0681818	val	5
0.553846	-0.0307692	0.45	-0.025	0.72	-0.04	val	6
0.755556	-0.0397661	0.871795	0	0.666667	-0.0595238	val	7
0.6875	-0.0105769	0.55	0	0.916667	-0.0366667	val	8
0.578947	-0.0036049	0.55	-0.025	0.611111	0.0252525	val	9
0.851064	-0.0043485	0.909091	-0.030303	0.8	0.0169014	val	10
0.957614	0.00163383	0.924242	0.0030303	0.993485	2.11515e-05	train	1
0.966507	0.00318979	0.964968	0.00318471	0.968051	0.00319489	train	2
0.966361	0.00231752	0.979845	0.00310078	0.953243	0.00157644	train	3
0.953096	0.000654315	0.98961	0.0012987	0.91918	9.73738e-05	train	4
0.884097	-0.00604825	0.792271	-0.00966184	1	0	train	5
0.979592	0	0.965944	0	0.993631	0	train	6
0.977602	0.00134526	0.971204	0.0026178	0.984085	4.21035e-05	train	7
0.988372	-0.00196433	0.980769	-0.00384615	0.996094	-1.53186e-05	train	8
0.962759	0.00285348	0.945799	0.00542005	0.980337	0.000109849	train	9
0.975737	0.00254319	0.9947	0	0.957483	0.00491017	train	10
0.580645	0.00951877	0.692308	-0.192308	0.5	0.22	test	1
0.643357	0.0104895	0.666667	0.0225225	0.621622	0.000329598	test	2
0.536232	0.0329989	0.493333	0.0939683	0.587302	-0.0350628	test	3
0.522222	-0.0160494	0.474747	0.0314254	0.580247	-0.0740741	test	4
0.393443	0.0327869	0.413793	-0.0075431	0.375	0.0732759	test	5
0.547945	0.0202366	0.666667	-0.0852713	0.465116	0.0904393	test	6
0.722892	-0.0183461	0.731707	0.00638792	0.714286	-0.0403727	test	7
0.733333	-0.0540881	0.733333	-0.133333	0.733333	0.0492754	test	8
0.688172	-0.014259	0.695652	-0.0360777	0.680851	0.00803783	test	9
0.824427	0.0176778	0.80597	0.0690299	0.84375	-0.0321558	test	10
0.466667	0.0505747	0.56	-0.131429	0.4	0.252174	val	1
0.701493	-0.0256305	0.691176	0.0512478	0.712121	-0.091868	val	2
0.621118	-0.00269696	0.609756	-0.0148194	0.632911	0.0109242	val	3
0.57485	0.00207278	0.564706	-0.0159254	0.585366	0.0227423	val	4
0.44	-0.0570213	0.44	-0.08	0.44	-0.0309091	val	5
0.554217	0.0499498	0.534884	0.190116	0.575	-0.0571429	val	6
0.761905	-0.0262726	0.711111	0.109402	0.820513	-0.153846	val	7
0.722222	0.00241546	0.8125	-0.1875	0.65	0.212069	val	8
0.613333	-0.0379909	0.657143	-0.132143	0.575	0.0613636	val	9
0.855072	-0.018193	0.819444	0.0744949	0.893939	-0.107273	val	10
0.886792	-0.0842242	0.921569	-0.163993	0.854545	-0.00130313	train	1
0.879173	-0.100242	0.877778	-0.0417905	0.880573	-0.151407	train	2
0.877743	-0.115201	0.88748	-0.180503	0.868217	-0.0406308	train	3
0.842236	-0.102223	0.807143	-0.0733766	0.880519	-0.134152	train	4
0.796915	-0.0634059	0.851648	-0.180151	0.748792	0.0593473	train	5
0.9	-0.153444	0.908517	-0.0695081	0.891641	-0.219184	train	6
0.940397	-0.0771602	0.951743	-0.0512191	0.929319	-0.100404	train	7
0.934363	-0.0725743	0.937984	-0.1226	0.930769	-0.0169761	train	8
0.87656	-0.0951781	0.897727	-0.14705	0.856369	-0.0416627	train	9
0.928263	-0.0374631	0.908629	0.0065649	0.948763	-0.0810916	train	10
0.6	0.0557377	0.5	0.0555556	0.75	0.05	test	1
0.647059	-0.0125761	0.594595	0.027027	0.709677	-0.0617901	test	2
0.586466	-0.00252456	0.619048	0.015873	0.557143	-0.0166023	test	3
0.540541	-0.0232992	0.617284	-0.0617284	0.480769	0.00310174	test	4
0.385965	0.00113186	0.34375	0.03125	0.44	-0.04	test	5
0.545455	0.0412121	0.488372	0.0232558	0.617647	0.0698529	test	6
0.632653	0.0491651	0.738095	-0.0238095	0.553571	0.0986025	test	7
0.642857	0	0.6	0	0.692308	0	test	8
0.560976	0.0612466	0.489362	0.106383	0.657143	-0.00598007	test	9
0.785714	0.00840336	0.859375	-0.015625	0.723684	0.0263158	test	10
0.5	-0.00877193	0.428571	-0.0285714	0.6	0.0363636	val	1
0.573643	-0.000113999	0.560606	0.030303	0.587302	-0.0301587	val	2
0.666667	-0.0169851	0.64557	0	0.689189	-0.035343	val	3
0.554913	-0.0159911	0.585366	-0.0365854	0.527473	0.00193924	val	4
0.409091	-0.0340909	0.36	0	0.473684	-0.0823799	val	5
0.561798	0.0535869	0.625	0.075	0.510204	0.0388155	val	6
0.725275	0.0308228	0.846154	-0.0512821	0.634615	0.0863148	val	7
0.746667	-0.0142723	0.7	-0.05	0.8	0.0387097	val	8
0.550725	0.04387	0.475	0.075	0.655172	-0.00811359	val	9
0.794326	0.0141844	0.848485	0.0151515	0.746667	0.0133333	val	10
0.676717	-0.00777494	0.63125	-0.01875	0.729242	0.00760023	train	1
0.672326	-0.0116851	0.655629	0.00993377	0.689895	-0.0341043	train	2
0.652137	-0.00385008	0.614534	-0.00157978	0.694643	-0.00669959	train	3
0.66217	-0.0062498	0.72	-0.0146667	0.61294	3.81427e-05	train	4
0.588235	0.0227308	0.517241	0.0591133	0.681818	-0.0318182	train	5
0.66358	-0.00943314	0.68254	-0.0190476	0.645646	-0.000583917	train	6
0.771392	0.0012718	0.820652	-0.0679348	0.727711	0.0659854	train	7
0.810916	0.00271108	0.822134	-0.0197628	0.8	0.0252033	train	8
0.707593	0.00838344	0.616901	0.0647887	0.829545	-0.0756514	train	9
0.862447	-0.0111303	0.927405	-0.0181488	0.805994	-0.0056742	train	10
0.644068	0.0333516	0.527778	0.0555556	0.826087	-0.0183946	test	1
0.716216	-0.0182296	0.716216	-0.0135135	0.716216	-0.0228829	test	2
0.625	-0.0625	0.634921	-0.0634921	0.615385	-0.0615385	test	3
0.586387	-0.00538185	0.691358	-0.0493827	0.509091	0.0215213	test	4
0.45283	0.0389731	0.375	0.09375	0.571429	-0.0541872	test	5
0.693333	-0.00102564	0.604651	0.0232558	0.8125	-0.0410714	test	6
0.74359	-0.00674764	0.690476	-0.0238095	0.805556	0.0179739	test	7
0.769231	0.018648	0.833333	0.0333333	0.714286	0.00793651	test	8
0.666667	0.0215054	0.638298	0.0425532	0.697674	-0.00202224	test	9
0.817518	0.00066357	0.875	-0.03125	0.767123	0.0269944	test	10
0.517241	0.00734878	0.428571	0.0285714	0.652174	-0.0367893	val	1
0.764706	-0.00211595	0.787879	0.0151515	0.742857	-0.0168297	val	2
0.674699	0.00431355	0.708861	-0.0126582	0.643678	0.0189724	val	3
0.662791	-0.0237374	0.695122	-0.0365854	0.633333	-0.0126437	val	4
0.571429	0.00634921	0.48	0.04	0.705882	-0.0558824	val	5
0.675325	0.0615174	0.65	0.05	0.702703	0.0750751	val	6
0.823529	-0.0378151	0.897436	-0.0512821	0.76087	-0.0275362	val	7
0.826667	0	0.775	0	0.885714	0	val	8
0.588235	0.0517647	0.5	0.1	0.714286	-0.0285714	val	9
0.855172	0.0143928	0.939394	-0.030303	0.78481	0.0485232	val	10
0.900164	0.0875664	0.833333	0.142424	0.978648	0.0213523	train	1
0.950198	0.037104	0.957006	0.0334395	0.943485	0.0406921	train	2
0.912281	0.0830609	0.886822	0.106977	0.939245	0.0576449	train	3
0.899196	0.0943357	0.944156	0.0532468	0.858323	0.131367	train	4
0.875318	0.110119	0.830918	0.149758	0.924731	0.0655127	train	5
0.945783	0.0511304	0.972136	0.0278638	0.920821	0.073025	train	6
0.953395	0.0413414	0.937173	0.052356	0.97019	0.0298103	train	7
0.963671	0.0344095	0.969231	0.0307692	0.958175	0.0379937	train	8
0.925926	0.065944	0.880759	0.111111	0.975976	0.0158939	train	9
0.954237	0.0413574	0.9947	0.00353357	0.916938	0.076032	train	10
0.626866	-0.0236911	0.583333	-0.0555556	0.677419	0.0262843	test	1
0.7	0.0285714	0.662162	0.027027	0.742424	0.030303	test	2
0.606897	0.0208407	0.698413	-0.015873	0.536585	0.0444957	test	3
0.582857	-0.00677019	0.62963	0.0246914	0.542553	-0.0279901	test	4
0.482759	0.0344828	0.4375	0.03125	0.538462	0.0384615	test	5
0.56338	0.0393594	0.465116	0.0465116	0.714286	0.0190476	test	6
0.752941	0.0235294	0.761905	0.0238095	0.744186	0.0232558	test	7
0.779661	-0.00546747	0.766667	0.0333333	0.793103	-0.0431034	test	8
0.695652	-0.0143335	0.680851	-0.0212766	0.711111	-0.00656566	test	9
0.818182	-0.00902151	0.84375	-0.015625	0.794118	-0.00307287	test	10
0.571429	0.00484262	0.514286	-0.0285714	0.642857	0.0654762	val	1
0.736842	0.0131579	0.742424	-0.0151515	0.731343	0.0428503	val	2
0.625	0.00914634	0.632911	0.0253165	0.617284	-0.00551924	val	3
0.642857	-0.0156382	0.658537	-0.0121951	0.627907	-0.0187116	val	4
0.583333	-0.0448718	0.56	0	0.608696	-0.0901771	val	5
0.623377	0.0348512	0.6	0.05	0.648649	0.018018	val	6
0.809524	-0.0143431	0.871795	-0.025641	0.755556	-0.00555556	val	7
0.773333	0.0211872	0.725	0	0.828571	0.0502165	val	8
0.631579	0.0263158	0.6	0.025	0.666667	0.0277778	val	9
0.842857	0.00820669	0.893939	0.0151515	0.797297	0.0027027	val	10
0.85759	-0.0119308	0.830303	-0.0333333	0.886731	0.0139535	train	1
0.819376	0.00696142	0.794586	0.00477707	0.845763	0.0094332	train	2
0.808675	0.00929512	0.809302	0.00930233	0.80805	0.00928793	train	3
0.77526	0.00945775	0.822078	0.0181818	0.733488	0.00257588	train	4
0.802005	0.0317419	0.772947	0.0386473	0.833333	0.0238095	train	5
0.866242	0	0.842105	0	0.891803	0	train	6
0.918848	-0.0052356	0.918848	-0.0052356	0.918848	-0.0052356	train	7
0.943026	-0.0144541	0.923077	-0.0230769	0.963855	-0.00483903	train	8
0.856338	-0.0158822	0.823848	-0.0243902	0.891496	-0.00560972	train	9
0.913601	-0.00666397	0.943463	0.00353357	0.885572	-0.0154423	train	10
